# Supplementary material for: Seeds of Stevia rebaudiana Bertoni as a Source of Plant Growth-Promoting Endophytic Bacteria with the Potential to Synthesize Rebaudioside A
Source: MDPI journal article supplement (doi:10.3390/ijms24032174), 2023-01-21

## Supplementary File 1

Table S1. BLASTn homology analysis of 16S rRNA gene fragment of the SRS89 strain.

|                                              | Accession No. | Query Cover | E value | Per. Ident. |
|----------------------------------------------|---------------|-------------|---------|-------------|
| <i>Pantoea agglomerans</i> strain DSM 3493   | NR_041978     | 100%        | 0.0     | 99.54%      |
| <i>Pantoea agglomerans</i> strain NCTC9381   | NR_114735     | 100%        | 0.0     | 99.23%      |
| <i>Pantoea agglomerans</i> strain NBRC102470 | NR_114111     | 100%        | 0.0     | 99.31%      |
| <i>Pantoea vagans</i> strain LMG24199        | NR_116115     | 100%        | 0.0     | 99.08%      |

Figure S1. Alignment of 16S rRNA gene fragment of the SRS89 strain to *P. agglomerans* (NR\_041978, NR\_114735, NR\_114111) and *P. vagans* (NR\_116115) strains.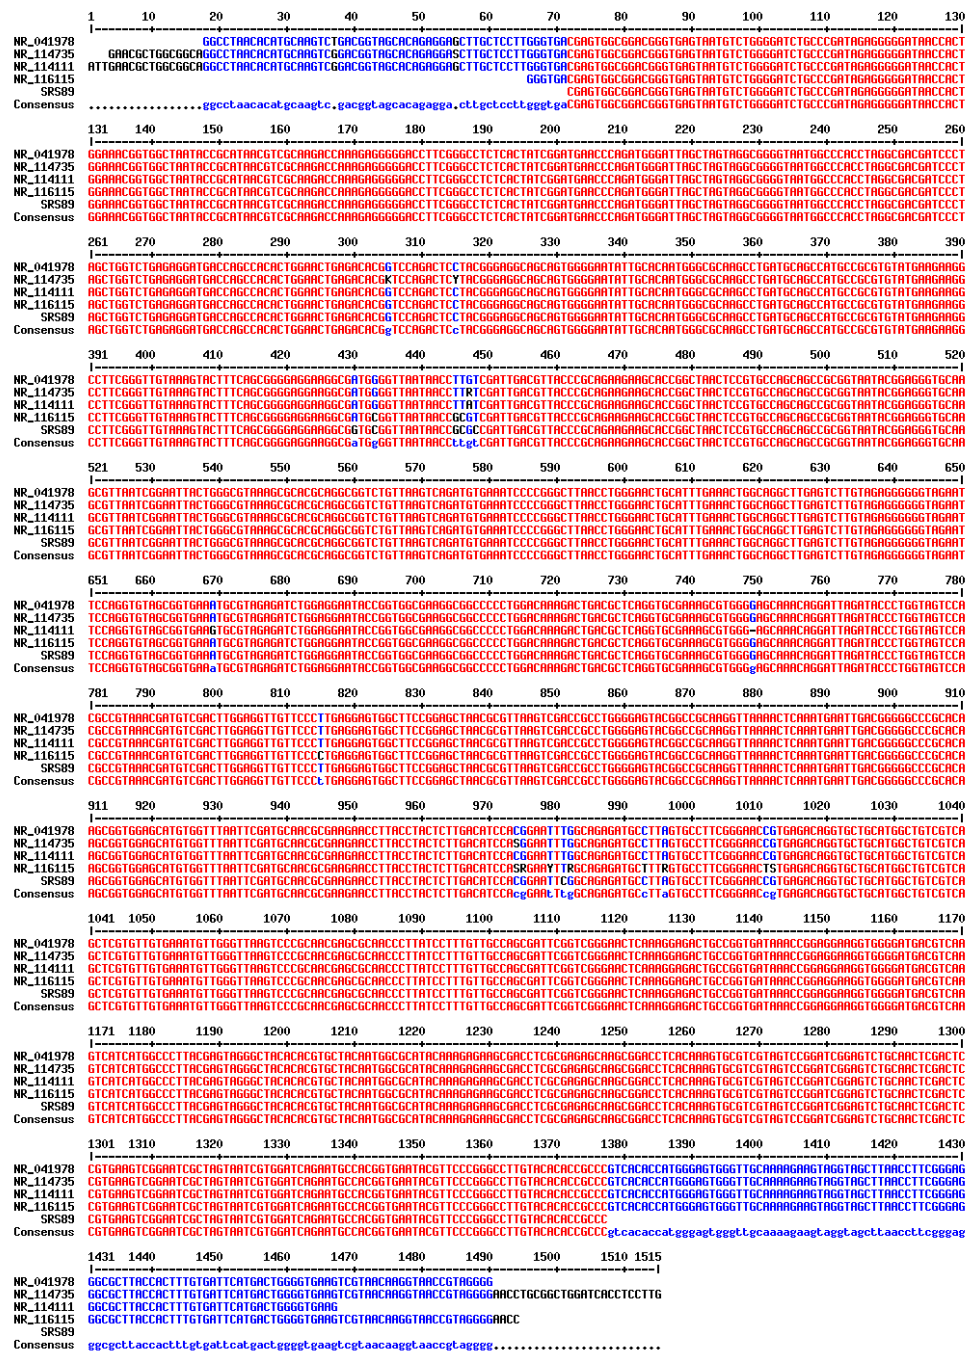

Supplement: s1 [file s1]
